# Supplementary material
Source: PubMed Central journal article supplement (PMC8180084)
Supplement: NIHMS1697196-supplement-mmc1.pdf [file NIHMS1697196-supplement-mmc1.pdf]

**Molecular Cell, Volume 81**

**Supplemental information**

**FANCM regulates repair pathway choice  
at stalled replication forks**

**Arvind Panday, Nicholas A. Willis, Rajula Elango, Francesca Menghi, Erin E. Duffey, Edison T. Liu, and Ralph Scully**

## Supplemental Figure Legends

### Figure S1. Genotype of *Fancm*<sup>Δ85/Δ</sup> *Ter*-HR reporter clone #39. Related to Figure 1.

**A.** PCR primers for detection of 85 bp frame-shift *Fancm*<sup>Δ85</sup> allele. Red half-arrow heads: genotyping primers. Gel: PCR products from *Fancm*<sup>+/+</sup> and *Fancm*<sup>Δ85/Δ</sup> gDNA. **B.** Primary DNA sequencing chromatogram of PCR product from a *Fancm*<sup>Δ85/Δ</sup> clone harboring the *Fancm*<sup>Δ85</sup> allele. **C.** Whole genome sequencing reads spanning *Fancm* exons 1 and 2 in *Fancm*<sup>Δ85/Δ</sup> clone #39. Note how 85 bp deletion within exon 2 has zero coverage. Red gapped reads in alignment track identify 2544 bp deletion in second (*Fancm*<sup>Δ</sup>) allele, overlapping the 85 bp deletion of the *Fancm*<sup>Δ85</sup> allele. *Fancm* exons are shown as blue bars below alignment track. Red bars below exons identify exact chromosome positions of the two deletions. **D.** RT qPCR analysis of *Fancm* mRNA normalized to *Gapdh* mRNA using the  $2^{-\Delta\text{CT}}$  method. Data shows mean  $\pm$  standard deviation (SD) from three independent experiments (n=3). \*\*\*\*: P < 0.0001 by one-way ANOVA. **E.** Cell cycle analysis of *Fancm*<sup>+/+</sup> and *Fancm*<sup>Δ85/Δ</sup> clones showing modest enrichment of G2/M fraction in *Fancm*<sup>Δ85/Δ</sup> cells.

### Figure S2. *Fancm* hemizygous cells retain wild type stalled fork repair phenotypes. Related to Figure 2.

**A.** RT qPCR analysis of *Brca1* mRNA in *Fancm*<sup>+/+</sup> or *Fancm*<sup>Δ85/Δ</sup> clones treated with siRNAs shown. Data shows mean  $\pm$  SD, normalized to *Gapdh* mRNA using the  $2^{-\Delta\text{CT}}$  method and analyzed by Student's *t*-test (n=3). \*\*: P<0.01. **B.** Gene modification strategy to generate hemizygous *Fancm*<sup>+/-</sup> clones using Cas9 with dual sgRNAs targeting exons 2 and 23. The *Fancm*<sup>-</sup> allele harbors the expected loss of the 53.2 kb *Fancm* gene. Red half arrowheads: PCR primers specific to Exons 2 and 23. Predicted PCR product size for *Fancm*<sup>+</sup> wild type allele shown. **C.** Upper left: Gel showing PCR products from *Fancm*<sup>+/+</sup> and *Fancm*<sup>+/-</sup> gDNA. Lower left: Primary DNA sequencing chromatogram of *Fancm*<sup>-</sup> allele PCR product verifies exon2 (green) to exon 23 (red) breakpoint. Right: Primary DNA sequencing chromatograms of *Fancm*<sup>+</sup> allelic PCR products from the same clone verify wild type sequence of *Fancm*<sup>+</sup> allele at sgRNA target sites. **D.** RT qPCR analysis of *Fancm* mRNA in *Fancm*<sup>+/+</sup> or *Fancm*<sup>+/-</sup> clones. Data shows mean  $\pm$  SD, normalized to *Gapdh* using the  $2^{-\Delta\text{CT}}$  method. Analysis by Student's *t*-test (n=3). ns: not significant. **E.** Tus/*Ter*- and I-SceI-induced repair in *Fancm*<sup>+/+</sup>, *Fancm*<sup>+/-</sup>, and

*Fancm*<sup>Δ85/Δ</sup> *Ter*-HR reporter clones co-transfected with Tus or I-SceI expression plasmids and siRNAs as shown. Data shows mean ± SEM. Analysis by Student's *t*-test (n=4). *Fancm*<sup>Δ85/Δ</sup> cells serve as control for *Fancm* mutant phenotype. All repair outcomes for *Fancm*<sup>+/+</sup> vs. *Fancm*<sup>+/-</sup> are not significantly different.

**Figure S3. Characterization of *Fancm*<sup>ΔMM1/-</sup> cells.** Related to **Figure 3**. **A.** *Fancm*<sup>ΔMM1</sup> allele. Red half-arrow heads: genotyping primers as shown. Gel: PCR products from *Fancm*<sup>+/-</sup> and *Fancm*<sup>ΔMM1/-</sup> gDNA. **B.** Primary DNA sequencing chromatogram from a representative *Fancm*<sup>ΔMM1/-</sup> clone indicates in-frame 366 bp deletion of MM1 coding sequence within the residual *Fancm* allele. **C.** Cell cycle analysis of *Fancm*<sup>+/-</sup> and *Fancm*<sup>ΔMM1/-</sup> clones. **D.** I-SceI-induced HR in *Fancm*<sup>+/-</sup> (white bars) clones vs. *Fancm*<sup>ΔMM1/-</sup> (gray) clones. Data obtained from same experiments as in **Figure 3G**. Data shows mean ± SEM. \*\*: P < 0.01, \*\*\*: P < 0.001 by one-way ANOVA (n=5). ns: not significant. **E.** I-SceI-induced HR in *Fancm*<sup>+/-</sup> vs. *Fancm*<sup>ΔMM1/-</sup> clones co-transfected with I-SceI expression plasmid and siRNAs as shown. Data obtained from same experiments as in **Figure 3H**. Data shows mean ± SEM. Analysis by Student's *t*-test (n=6). \*: P < 0.05, ns: not significant. **F.** Tus/*Ter*-induced repair in *Fancm*<sup>+/-</sup> vs. *Fancm*<sup>ΔMM1/-</sup> clones co-transfected with Tus expression plasmid and siRNAs as shown. Data shows mean ± SEM. Analysis by Student's *t*-test (n=4). \*: P < 0.05, ns: not significant. **G.** RT qPCR analysis of *FANCA* and *FANCF* mRNA in *Fancm*<sup>+/-</sup> or *Fancm*<sup>ΔMM1/-</sup> clones treated with siRNAs shown. Data shows mean ± SD, normalized to *Gapdh* mRNA using the 2<sup>-ΔCT</sup> method. Analysis by Student's *t*-test (n=3). \*\*: P<0.01.

**Figure S4. Characterization of *Fancm*<sup>ΔMM2/-</sup> cells.** Related to **Figure 4**. **A.** *Fancm*<sup>ΔMM2</sup> allele. Red half-arrow heads: genotyping primers as shown. Gel: PCR products of *Fancm*<sup>+/-</sup> and *Fancm*<sup>ΔMM2/-</sup> gDNA. **B.** Primary DNA sequencing chromatogram from a representative *Fancm*<sup>ΔMM2/-</sup> clone indicates in-frame 114 bp deletion of MM2 coding sequence within the residual *Fancm* allele. **C.** Proliferative competition assay in presence of Mitomycin C (MMC), measuring enrichment of GFP<sup>+</sup> *Fancm*<sup>+/-</sup> vs. GFP<sup>-</sup> *Fancm*<sup>ΔMM2/-</sup> cells. Data, normalized to 0 μg/mL MMC, shows mean value (n=3). Error bars: standard deviation. **D.** Cell cycle analysis of *Fancm*<sup>+/-</sup> and *Fancm*<sup>ΔMM2/-</sup> clones. **E.** ChIP analysis of FANCM and FANCA at Tus/*Ter* RFB in *Fancm*<sup>+/-</sup> cells (n=3)

co-transfected with Tus expression plasmid and siRNAs as shown. Elements and data analysis as in Figure 1G. \*\*\*:  $P < 0.001$  by one-way ANOVA. **F.** I-SceI-induced HR in three *Fancm*<sup>+/-</sup> (white) clones vs. three *Fancm*<sup>ΔMM2/-</sup> (gray) clones. Data obtained from same experiments as in Figure 4F. Data shows mean ± SEM. Analysis by one-way ANOVA (n=4). ns: not significant. **G.** I-SceI-induced HR in *Fancm*<sup>+/-</sup> vs. *Fancm*<sup>ΔMM2/-</sup> clones co-transfected with I-SceI expression plasmid and siRNAs as shown. Data obtained from same experiments as in Figure 4G. Data shows mean ± SEM. Analysis by Student's *t*-test (n=5).\*:  $P < 0.05$ , \*\*:  $P < 0.01$ , ns: not significant.

**Figure S5. Characterization of ATP hydrolysis -defective *Fancm*<sup>ΔDEAH/-</sup> and point mutant *Fancm*<sup>D202A/Δ85</sup> cells.** Related to **Figure 5**. **A.** *Fancm*<sup>ΔDEAH/-</sup> allele. Red half-arrow heads: genotyping primers as shown. Gel: PCR products from *Fancm*<sup>+/-</sup> and *Fancm*<sup>ΔDEAH/-</sup> gDNA. **B.** Primary DNA sequencing chromatogram from a representative *Fancm*<sup>ΔDEAH/-</sup> clone indicates in-frame 66 bp deletion of sequence encoding the DEAH motif within the residual *Fancm* allele. **C.** Cell cycle analysis of *Fancm*<sup>+/-</sup> and *Fancm*<sup>ΔDEAH/-</sup> cells. **D.** I-SceI-induced HR in *Fancm*<sup>+/-</sup> (white) clones vs. *Fancm*<sup>ΔDEAH/-</sup> (gray) clones. Data shows mean ± SEM values from same experiments as in **Figure 5I**. Analysis by one-way ANOVA (n=5). \*\*\*\*:  $P < 0.0001$ . ns: not significant. **E.** I-SceI-induced HR in *Fancm*<sup>+/-</sup> vs. *Fancm*<sup>ΔDEAH/-</sup> clones co-transfected with I-SceI expression plasmid and siRNAs as shown. Data shows mean ± SEM values from same experiments as in **Figure 5J**. Analysis by Student's *t*-test (n=5). \*:  $P < 0.05$ , \*\*:  $P < 0.01$ , \*\*\*:  $P < 0.001$ , ns: not significant. **F.** Primary DNA sequencing chromatogram from a *Fancm*<sup>D202A</sup> clone indicates D202A point mutation sequence. **G.** Immunoblot of chromatin-extracted FANCM in *Fancm*<sup>+/-</sup> and *Fancm*<sup>D202A/Δ85</sup> clones. \*: non-specific band. **H.** Immunoblot showing FANCD2 ubiquitination in *Fancm*<sup>+/-</sup> and *Fancm*<sup>D202A/Δ85</sup> cells. **I.** Proliferative competition assay in presence of MMC, measuring enrichment of GFP<sup>+</sup> *Fancm*<sup>+/-</sup> vs. GFP<sup>-</sup> *Fancm*<sup>D202A/Δ85</sup> cells. Data, normalized to 0 μg/mL MMC, shows mean ± SD (n=3). **J.** ChIP analysis of FANCM and FANCA at Tus/*Ter* in *Fancm*<sup>+/-</sup> and *Fancm*<sup>D202A/Δ85</sup> cells. Elements and data analysis as in **Figure 1G**. \*\*\*:  $P < 0.001$  by one-way ANOVA (n=3). **K.** Tus/*Ter*-induced repair in *Fancm*<sup>+/-</sup> vs. *Fancm*<sup>D202A/Δ85</sup> clones co-transfected with Tus expression plasmid

and siRNAs as shown. Data shows mean  $\pm$  SEM. Analysis by Student's *t*-test (n=5). \*: P < 0.05, \*\*: P < 0.01, \*\*\*: P < 0.001, \*\*\*\*: P < 0.0001, ns: not significant.

**Figure S6. BLM can act independently of *Fancm* in stalled fork repair.** Related to **Figure 5**. **A.** Upper: Cartoon of degron tagged BLM, indicating position of SMASH protease cleavage. Note 8x HA tag is positioned at the very C terminus of the protease-cleaved protein. Lower: Anti-HA immunoblot of degron-tagged BLM 24 hours after addition of degron-activating drugs 5-IAA and/or Asunaprevir, vs. DMSO control. H3: Histone H3 loading control. **B.** Anti-HA ChIP analysis of BLM-HA at Tus/*Ter* in *Blm*<sup>deg/-</sup> cells treated with 5-IAA+Asunaprevir or with DMSO control (n=3). Data shows mean  $\pm$  SD. Analysis by ANOVA (n=3). \*\*\*\*: P < 0.0001. **C.** Tus/*Ter*-induced repair in *Blm*<sup>deg/-</sup> *Fancm*<sup>+/+</sup> and *Blm*<sup>deg/-</sup> *Fancm* <sup>$\Delta$ 85/ $\Delta$</sup>  clones co-transfected with Tus expression plasmid and siRNAs as indicated. Cells were treated with IAA+Asunaprevir vs. DMSO control beginning 6 hours after transfection with replenishment with fresh drug 24 hours after transfection. Data shows mean  $\pm$  SEM. Analysis by Student's *t*-test (n=5). \*: P<0.05, \*\*: P < 0.01. ns: not significant. **D.** RT qPCR analysis of *BRCA1* mRNA in *Fancm*<sup>+/+</sup> or *Fancm* <sup>$\Delta$ 85/ $\Delta$</sup>  clones treated with siRNAs shown. Data shows mean  $\pm$  SD, normalized to *Gapdh* mRNA using the 2<sup>- $\Delta$ CT</sup> method. Analysis by Student's *t*-test (n=3). \*\*: P<0.01 **E.** Tus/*Ter*-induced repair in *Fancm*<sup>+/+</sup>, *Fancm* <sup>$\Delta$ MM2/-</sup>, *Fancm* <sup>$\Delta$ 85/ $\Delta$</sup>  and *Fancm* <sup>$\Delta$ DEAH/-</sup> clones co-transfected with Tus expression plasmid and siRNAs as indicated. Data shows mean  $\pm$  SEM. Analysis by Student's *t*-test (n=5). \*: P<0.05. **F.** RT qPCR analysis of *Blm* mRNA in *Fancm*<sup>+/+</sup> or *Fancm* <sup>$\Delta$ 85/ $\Delta$</sup>  clones treated with siRNAs shown. Data shows mean  $\pm$  SD, normalized to *Gapdh* mRNA using the 2<sup>- $\Delta$ CT</sup> method. Analysis by Student's *t*-test (n=3). \*\*\*: P < 0.001, \*\*: P<0.01. **G.** RT qPCR analysis of *Brcal* or *Blm* mRNA in *Fancm*<sup>+/-</sup>, *Fancm* <sup>$\Delta$ 85/ $\Delta$</sup> , clones treated with siRNAs as shown. Data shows mean  $\pm$  SD, normalized to *Gapdh* mRNA using the 2<sup>- $\Delta$ CT</sup> method. Analysis by Student's *t*-test (n=3). \*\*: P < 0.01, \*\*\*: P < 0.001, ns: not significant.

**Figure S7. Analysis of viable *Fancm* <sup>$\Delta$ 85/ $\Delta$</sup>  *Brcal* <sup>$\Delta$ 11</sup> clone #68.** Related to **Figure 6**.

**A.** Whole genome sequencing reads spanning *Brcal* exons 10, 11 and 12 in the viable *Fancm* <sup>$\Delta$ 85/ $\Delta$</sup>  *Brcal* <sup>$\Delta$ 11</sup> clone #68. *Brcal* exons shown in blue bars beneath alignment track. *Fancm* exons are shown as blue bars below

alignment track. Red bars below exons identify positions of the two deletions within exon 11. **B.** Whole genome sequencing reads spanning *Fancm* exons 1 and 2 in *Fancm*<sup>Δ85/Δ</sup> clone #39. Elements as in Figure S1C. **C.** Tus/*Ter*-induced repair in *Fancm*<sup>+/+</sup> or Cre-transduced *Fancm*<sup>Δ85/Δ</sup> clones having retained or deleted (clone #68) *Brcal* exon 11, co-transfected with Tus-expression plasmid and siRNAs as shown. Note induction of TDs in *Fancm*<sup>Δ85/Δ</sup> *Brcal*<sup>Δ/11</sup> clone in absence of BRCA1 depletion. Data shows mean ± SEM. Analysis by Student's *t*-test (n=3). \*: P<0.05, \*\*: P < 0.01. ns: not significant. **D.** I-SceI-induced repair in the same experiments as in panel C.

**A**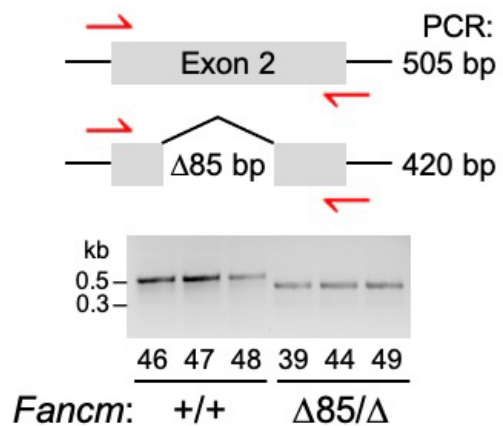**B***Fancm*: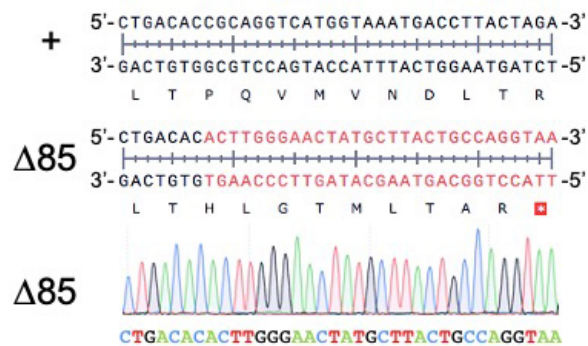**C***Fancm*<sup>Δ85/Δ</sup> Clone #39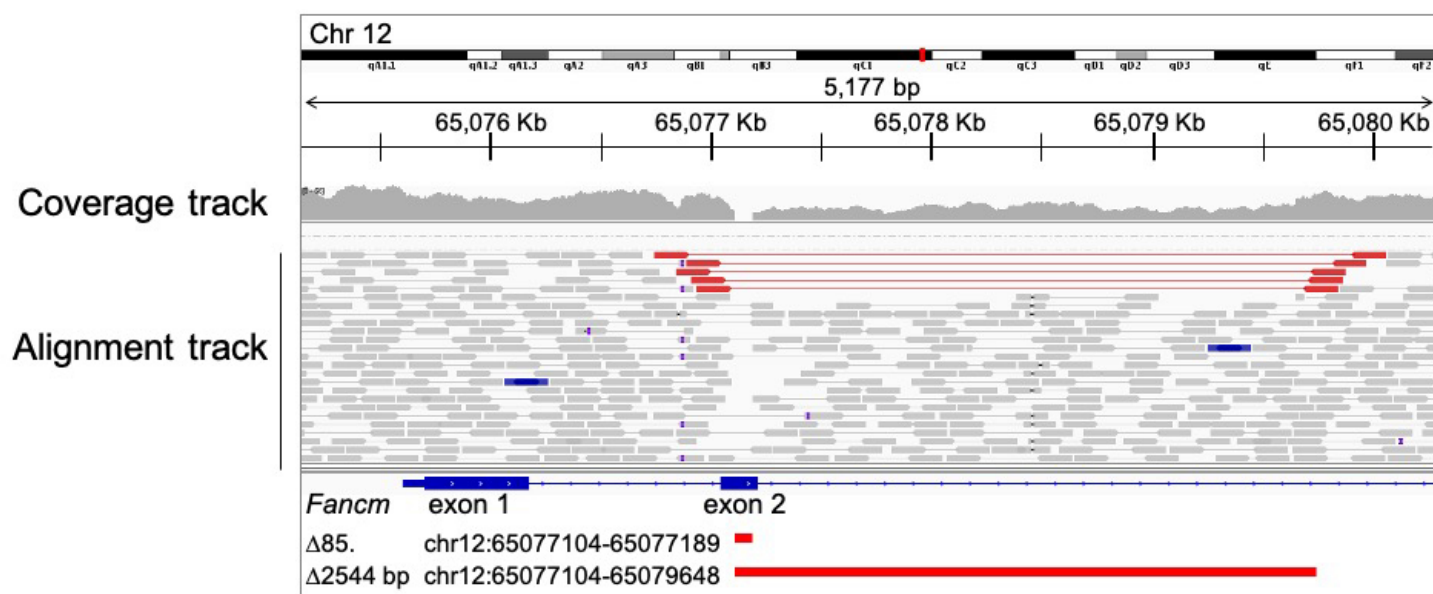**D**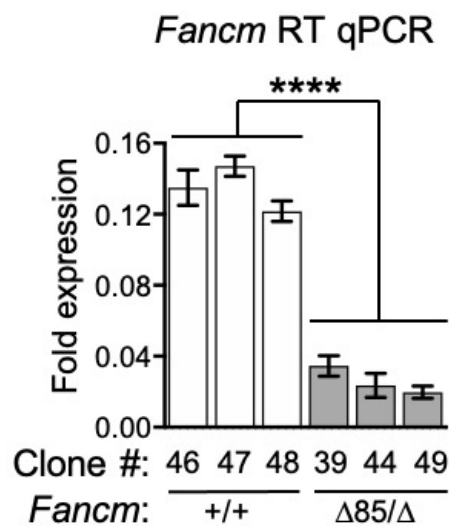**E**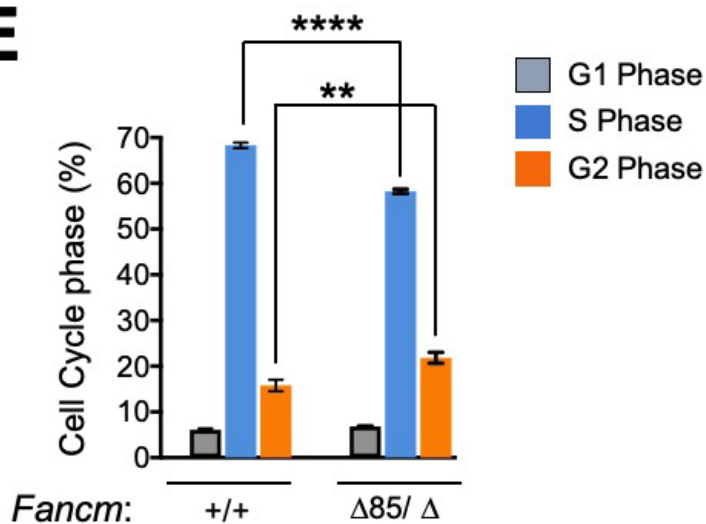

**A**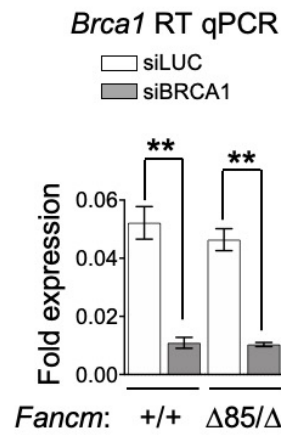**B**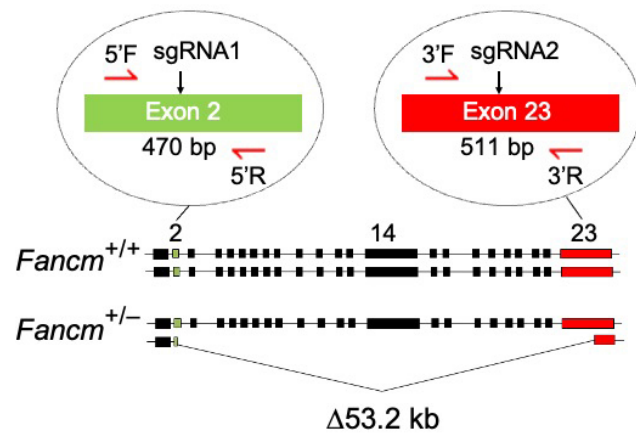**C**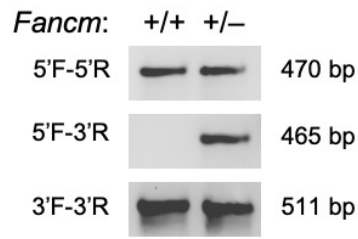**D**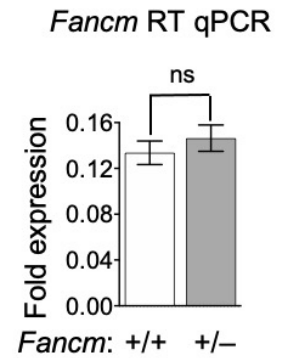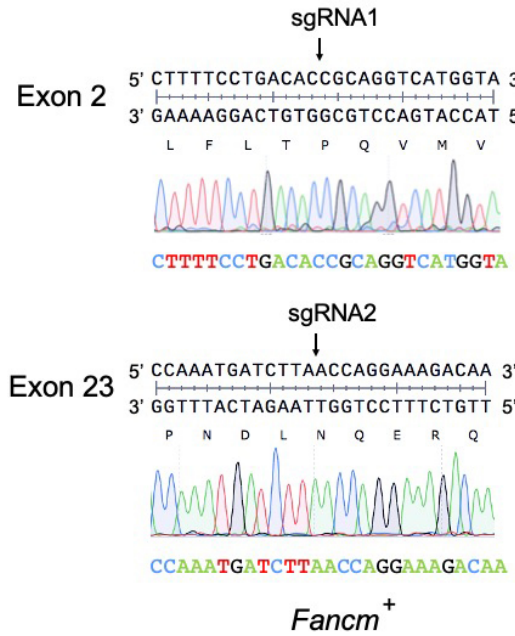**E**

Legend: ■ siLUC, ■ siBRCA1

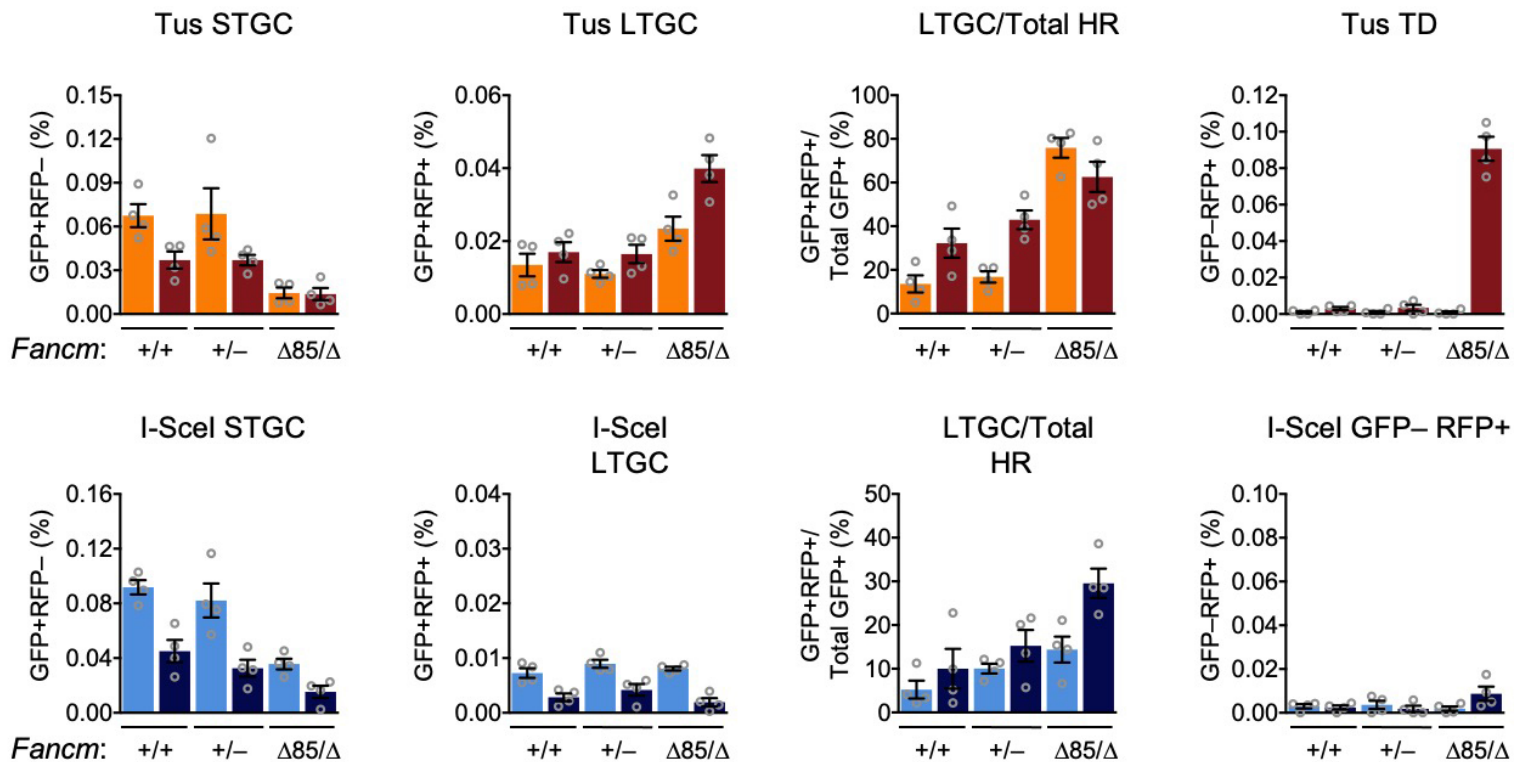



**A**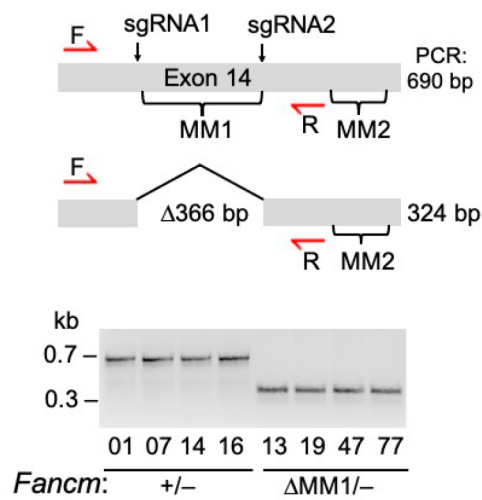**B**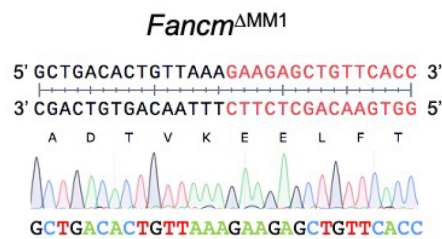**C**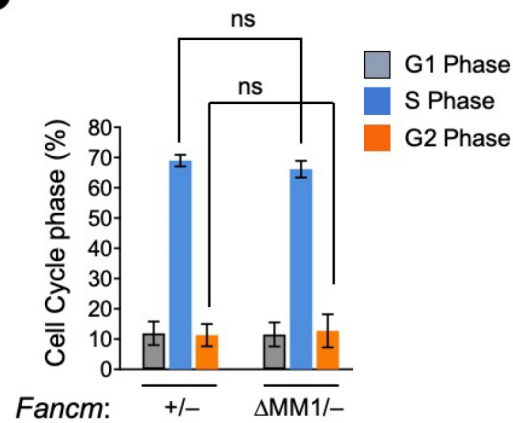**D**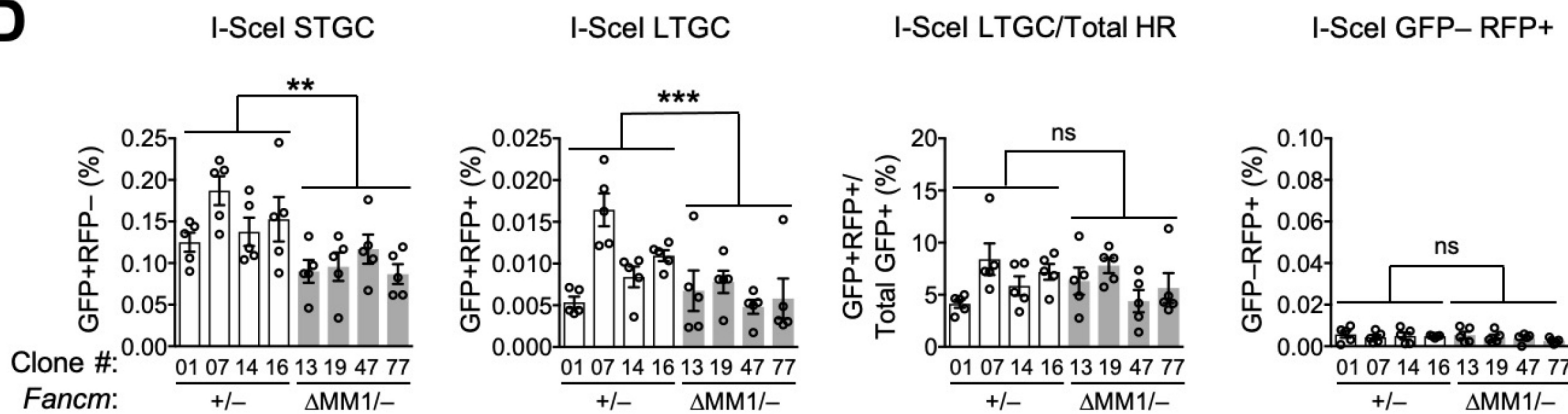**E**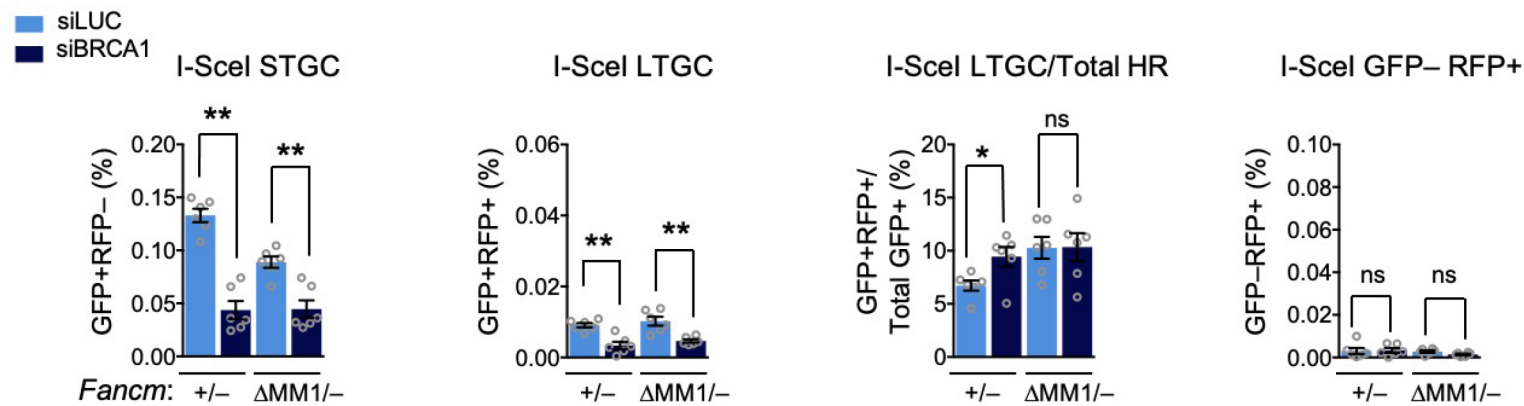**F**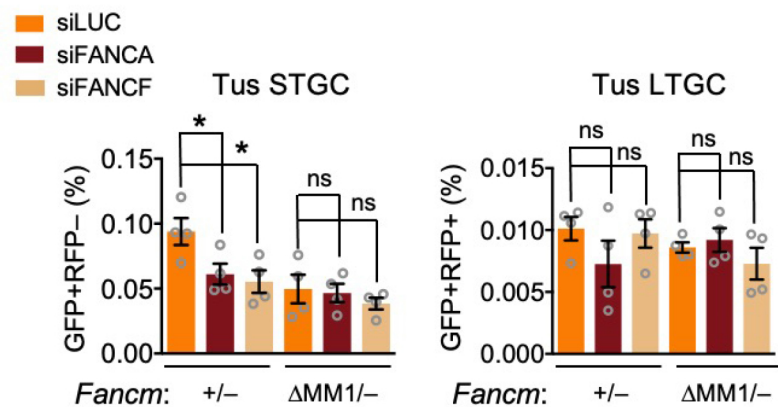**G**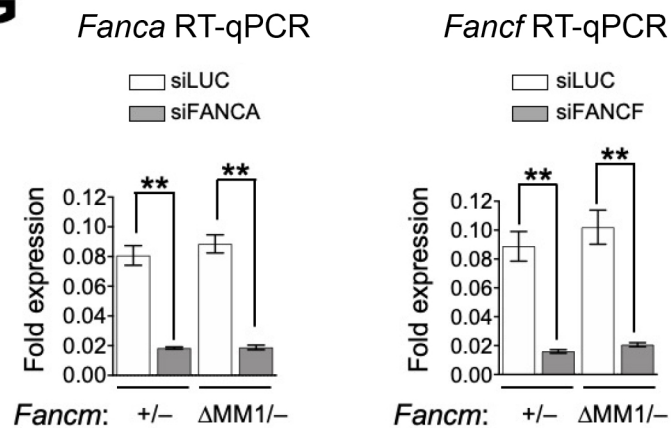

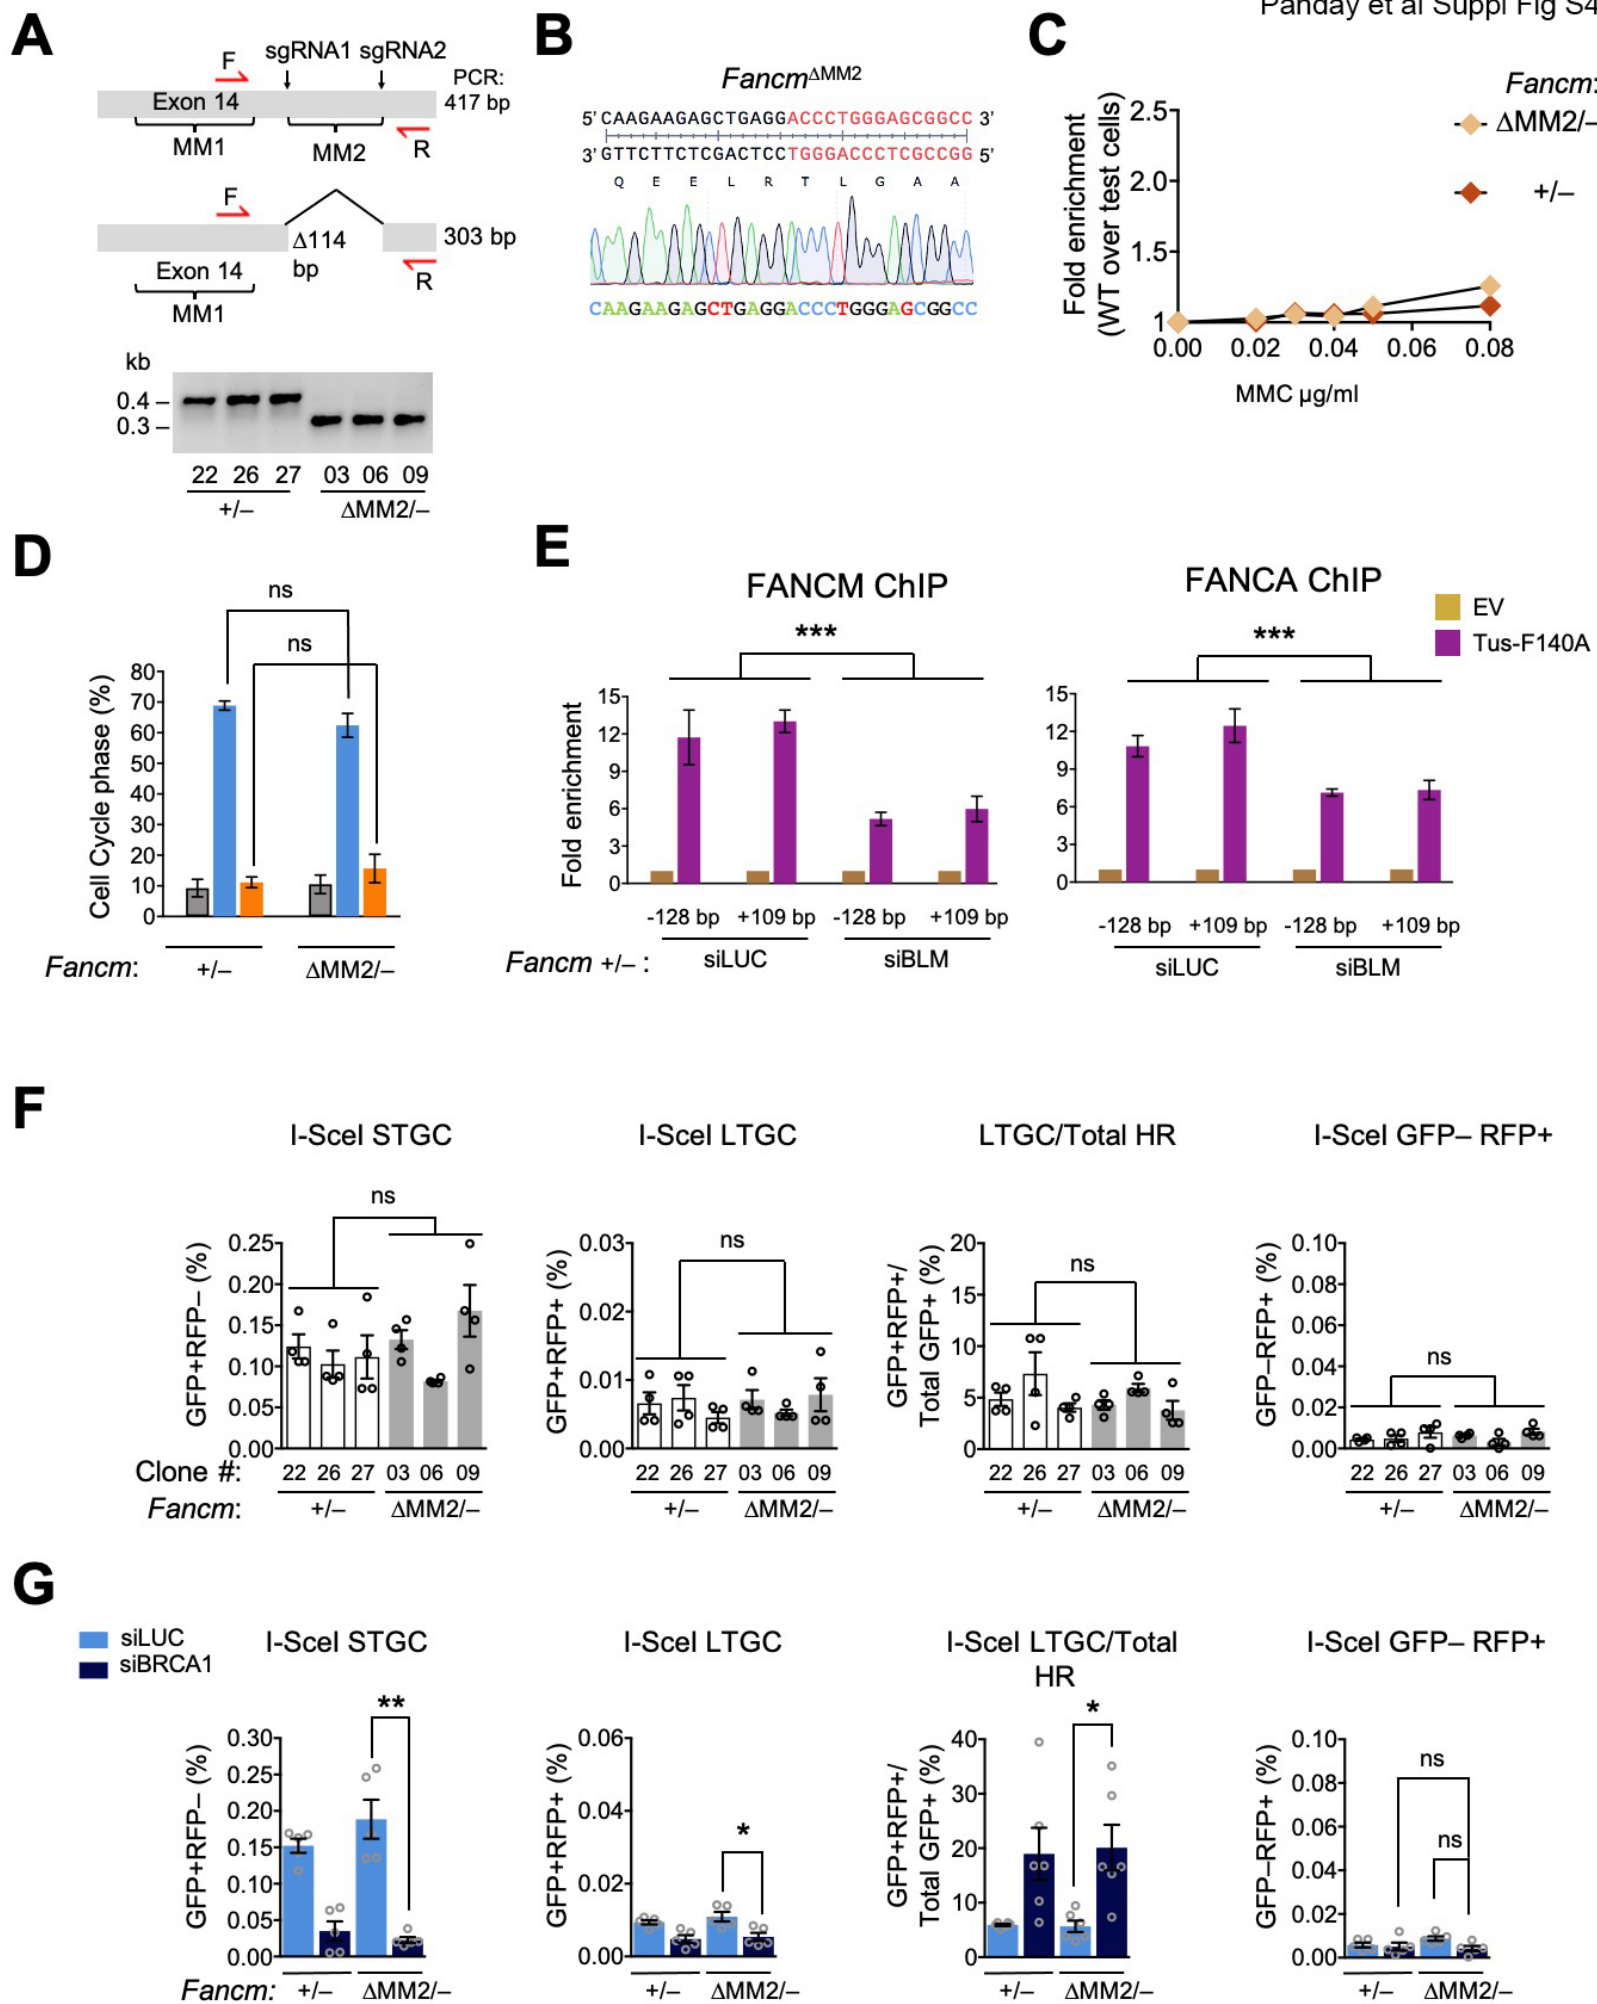

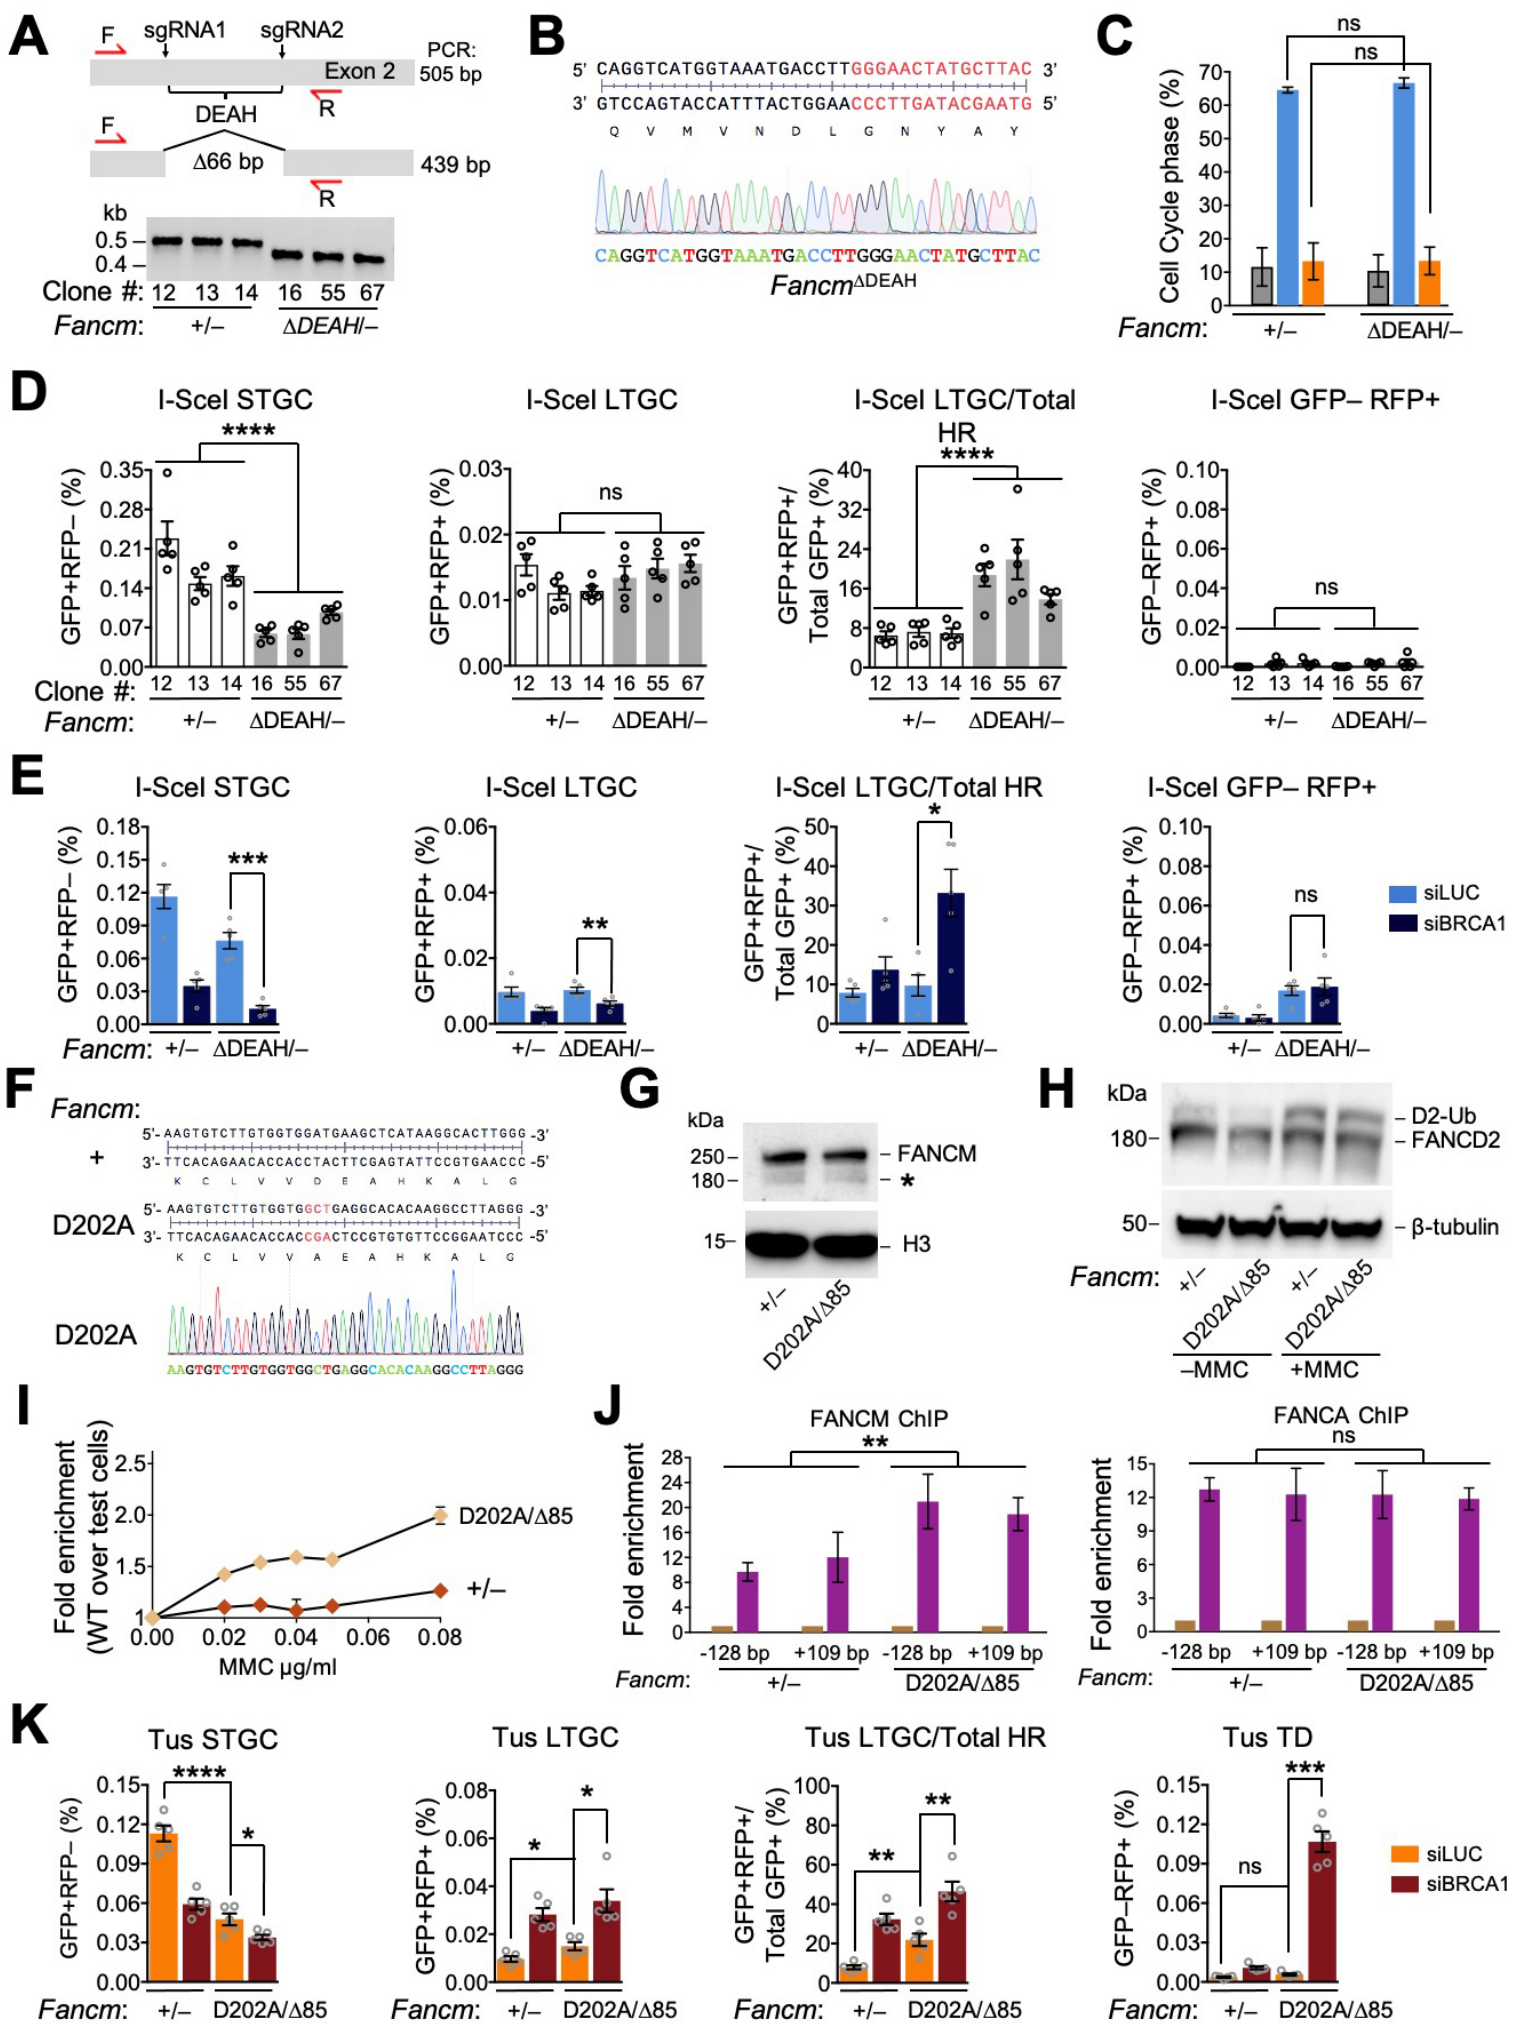

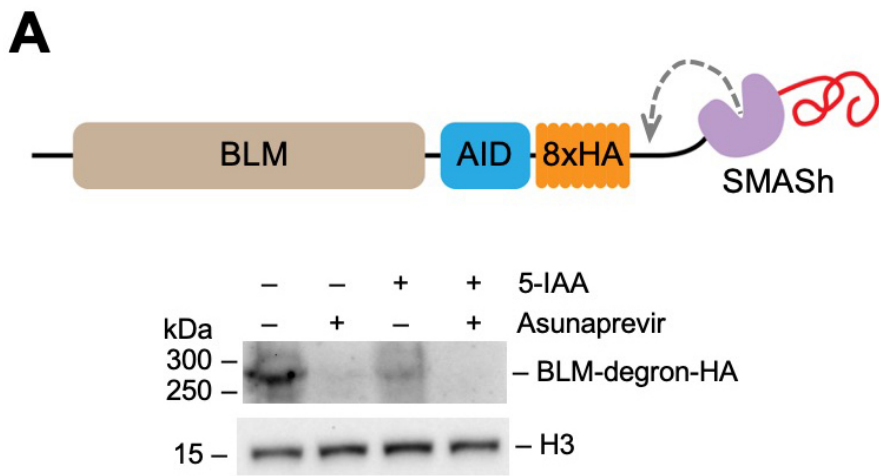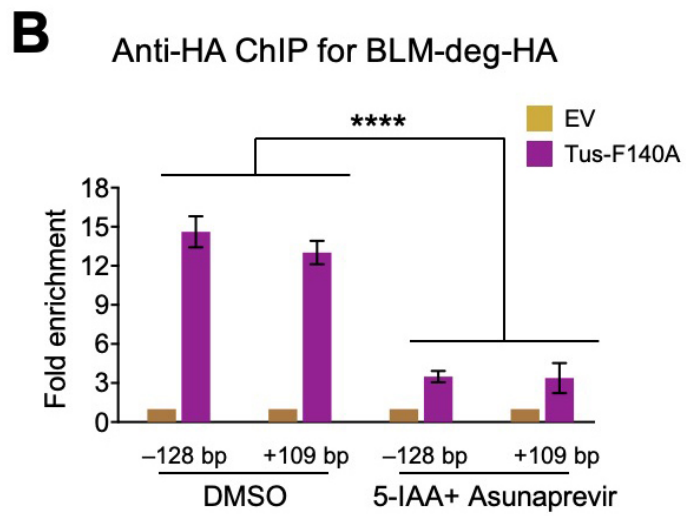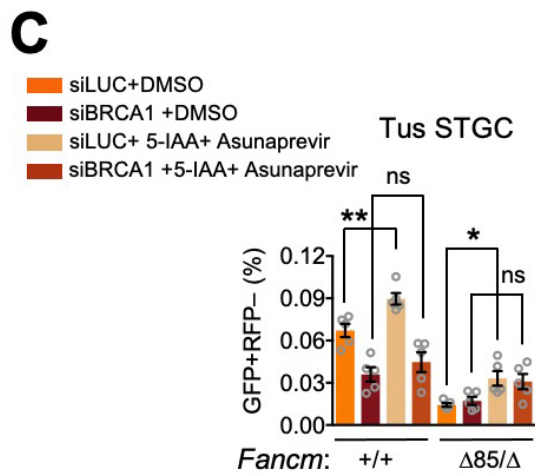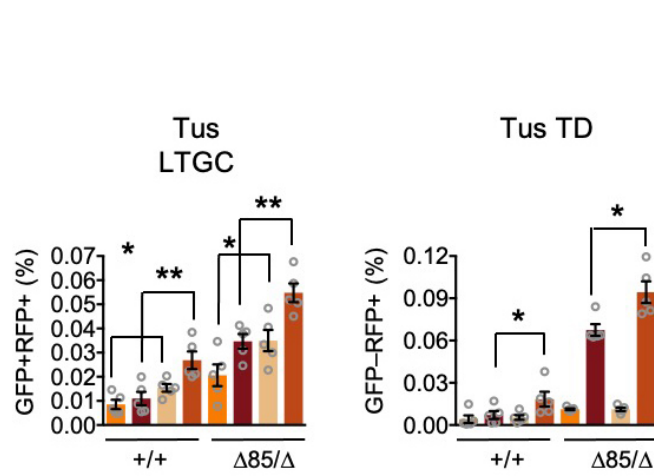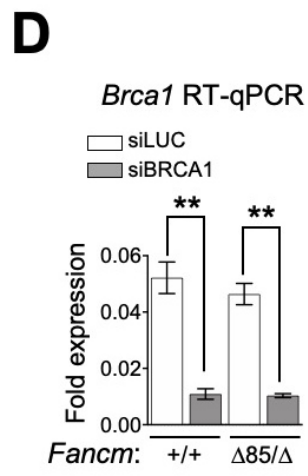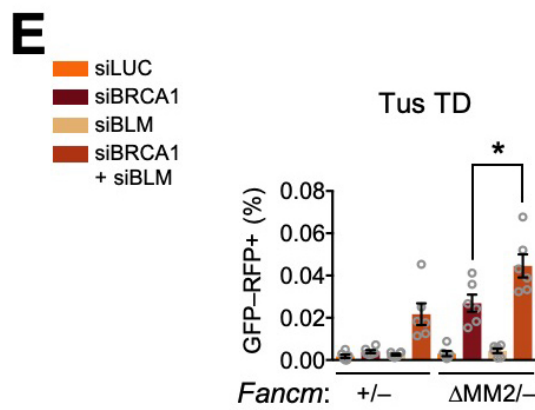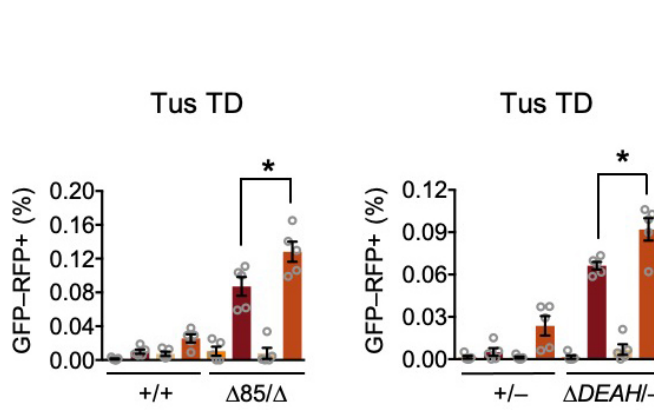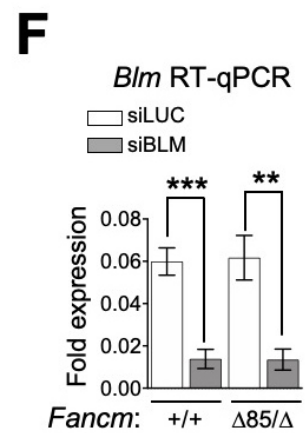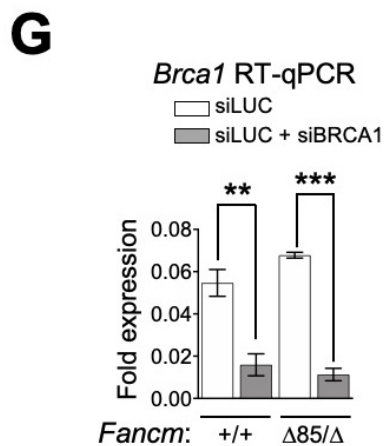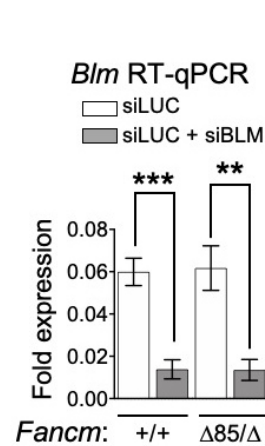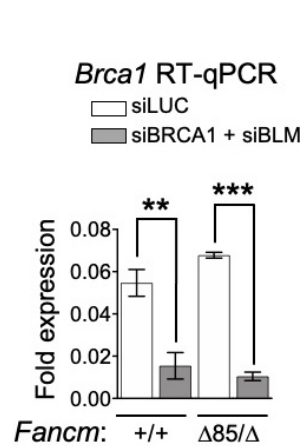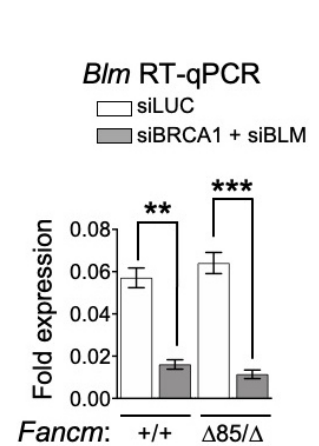

**A**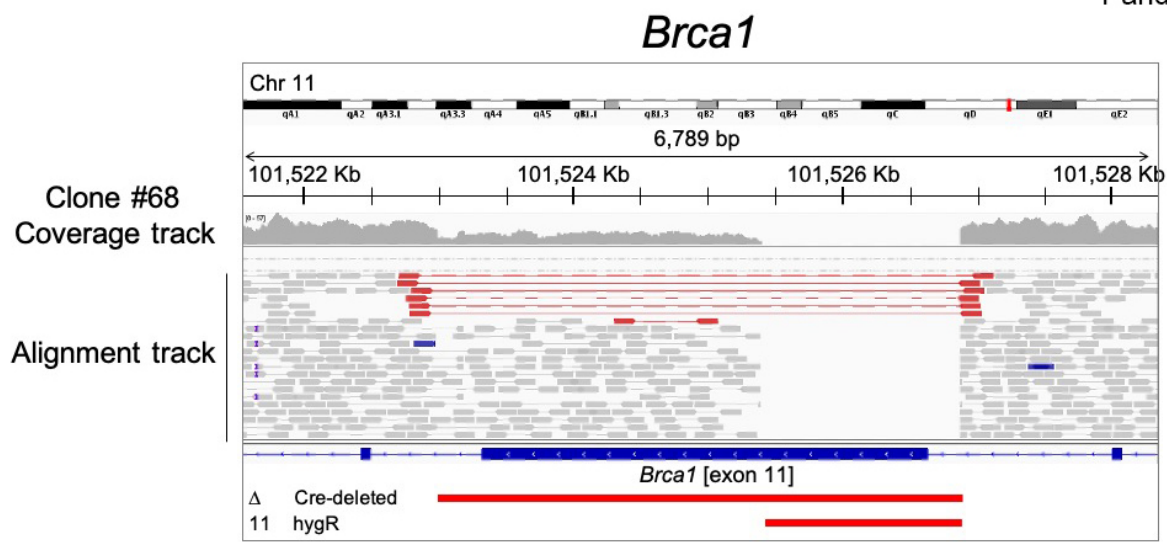**B**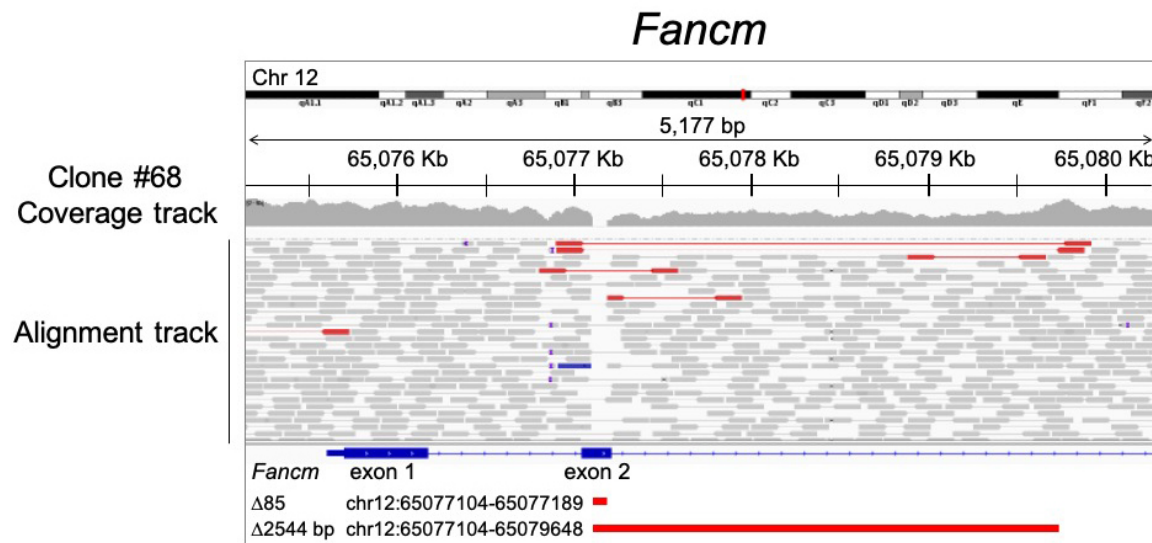**C**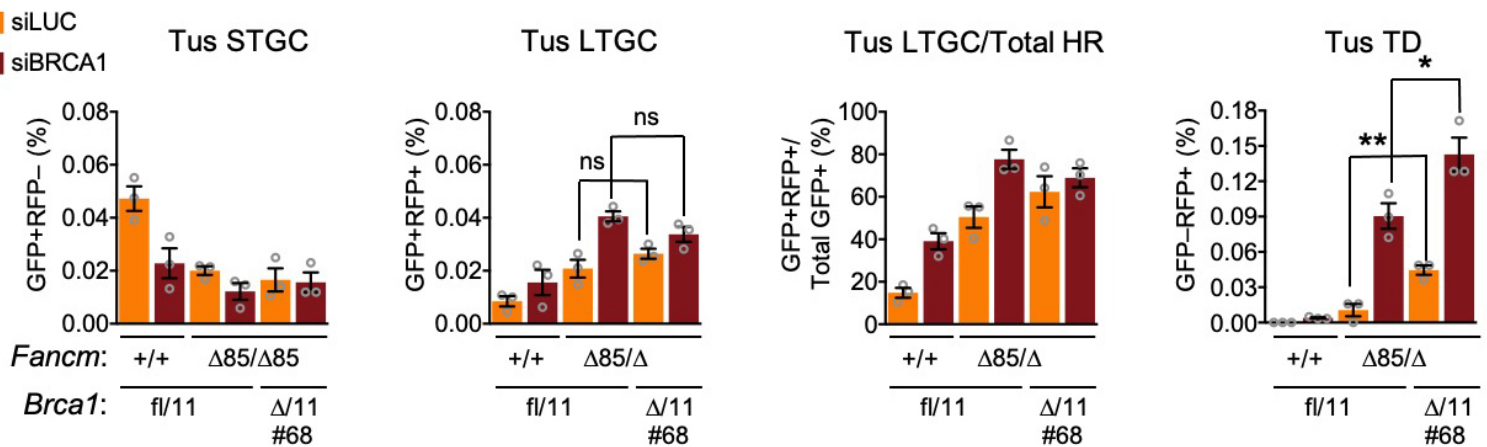**D**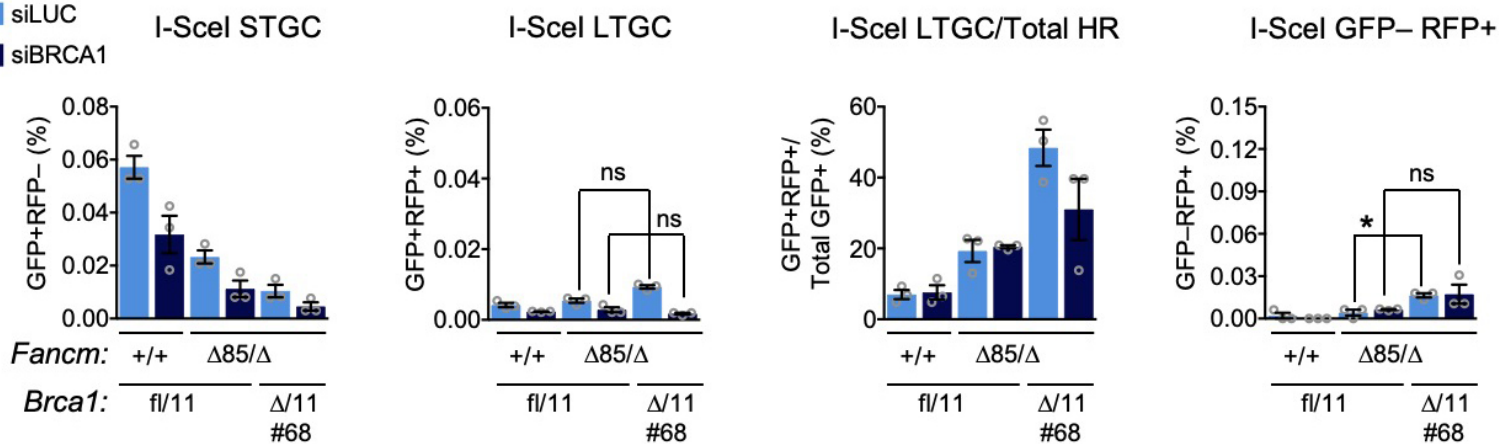

**Supplemental Table S1. Oligonucleotides used in this study.** Related to STAR Methods.

| Oligonucleotides                                                                                                                                                                                                                                                               | SOURCE                      | IDENTIFIER |
|--------------------------------------------------------------------------------------------------------------------------------------------------------------------------------------------------------------------------------------------------------------------------------|-----------------------------|------------|
| Primer: <i>Fancm</i> <sup>Δ85/Δ</sup> 5' exon2 breaksite sgRNA transcription, 5'-GGTTCCTTTTCCTGACACCGCAGG-3'                                                                                                                                                                   | ThermoFisher Scientific     | N/A        |
| Primer: <i>Fancm</i> <sup>Δ85/Δ</sup> 3' exon2 breaksite sgRNA transcription, 5'-GATGAAGCTCATAAGGCACTTGG-3'                                                                                                                                                                    | ThermoFisher Scientific     | N/A        |
| Primer: <i>Fancm</i> exon23 breaksite sgRNA transcription, 5'-GTTACCAAATGATCTTAACCAGG-3'                                                                                                                                                                                       | ThermoFisher Scientific     | N/A        |
| Primer: <i>Fancm</i> exon2 sense PCR and sequencing, 5'-CTACCTCAAGCTCCAGAGTCCTGG-3'                                                                                                                                                                                            | ThermoFisher Scientific     | N/A        |
| Primer: <i>Fancm</i> exon2 antisense PCR and sequencing, 5'-AGTTCCCATCACTGAGACTTATTCC-3'                                                                                                                                                                                       | ThermoFisher Scientific     | N/A        |
| Primer: <i>Fancm</i> exon23 sense PCR and sequencing, 5'-CTACCTCAAGCTCCAGAGTCCTGG-3'                                                                                                                                                                                           | ThermoFisher Scientific     | N/A        |
| Primer: <i>Fancm</i> exon23 antisense PCR and sequencing, 5'-AGGGATGACCTGAGGTTGTC-3'                                                                                                                                                                                           | ThermoFisher Scientific     | N/A        |
| Primer: <i>Fancm</i> MM1 5' breaksite sgRNA transcription, 5'-ATGCTGACACTGTAAACAAAGG-3'                                                                                                                                                                                        | ThermoFisher Scientific     | N/A        |
| Primer: <i>Fancm</i> MM1 3' breaksite sgRNA transcription, 5'-GTGAACAGCTCTTCTTCCAATGG-3'                                                                                                                                                                                       | ThermoFisher Scientific     | N/A        |
| Primer: <i>Fancm</i> MM2 5' breaksite sgRNA transcription, 5'-CAAGAAGAGCTGAGGACTGACGG-3'                                                                                                                                                                                       | ThermoFisher Scientific     | N/A        |
| Primer: <i>Fancm</i> MM2 3' breaksite sgRNA transcription, 5'-TCTGATAGGACTCGCACCTGGG-3'                                                                                                                                                                                        | ThermoFisher Scientific     | N/A        |
| Primer: <i>Fancm</i> DEAH 5' breaksite sgRNA transcription, 5'-TGGTAAATGACCTTACTAGAGGG-3'                                                                                                                                                                                      | ThermoFisher Scientific     | N/A        |
| Primer: <i>Fancm</i> DEAH 3' breaksite sgRNA transcription, 5'-ATGAAGCTCATAAGGCACTTGGG-3'                                                                                                                                                                                      | ThermoFisher Scientific     | N/A        |
| Primer: <i>Fancm</i> MM1 sense PCR and sequencing, 5'-CTTGTTTTGGTAGGGTGAATGCA-3'                                                                                                                                                                                               | ThermoFisher Scientific     | N/A        |
| Primer: <i>Fancm</i> MM1 antisense PCR and sequencing, 5'-GGGAGAACGGGATAAAAATCTCT-3'                                                                                                                                                                                           | ThermoFisher Scientific     | N/A        |
| Primer: <i>Fancm</i> MM2 sense PCR and sequencing, 5'-TAGATGATGATTCTGAACCTGAAGAC-3'                                                                                                                                                                                            | ThermoFisher Scientific     | N/A        |
| Primer: <i>Fancm</i> MM2 antisense PCR and sequencing, 5'-TGTGCTCCTGACTCTCTGCT-3'                                                                                                                                                                                              | ThermoFisher Scientific     | N/A        |
| Primer: <i>Fancm</i> DEAH sense PCR and sequencing, 5'-CTACCTCAAGCTCCAGAGTCCTGG-3'                                                                                                                                                                                             | ThermoFisher Scientific     | N/A        |
| Primer: <i>Fancm</i> DEAH antisense PCR and sequencing, 5'-AGTTCCCATCACTGAGACTTATTCC-3'                                                                                                                                                                                        | ThermoFisher Scientific     | N/A        |
| ultramer: ssODN D202A mutation within exon 2, 5'-<br>TGGTCCAGCAGGAGGGTCTTTTCCTGACACCGCAGGTCA<br>TGGTAAATGACCTTACTAGAGGGGCTGTTCTGCCACCCAC<br>GTAAAGTGTCTTGTGGTGGCTGAGGCACACAAGGCCTTAG<br>GGAAGTATGCTTACTGCCAGGTAAGCTCTTTTTTCAAATGCT<br>AGTTTGTAGAGGATGCATAAATTCTTAACGGGCTTGG-3' | Integrated DNA Technologies | N/A        |
| Primer: <i>Fancm</i> exon2 D202A targeting sgRNA transcription, 5'-GATGAAGCTCATAAGGCACTTGG-3'                                                                                                                                                                                  | ThermoFisher Scientific     | N/A        |
| Primer: <i>Blm</i> gene 5' breaksite sgRNA transcription, 5'-ATCCACCCAGGAAATCCCGAGG-3'                                                                                                                                                                                         | ThermoFisher Scientific     | N/A        |

|                                                                                                       |                         |     |
|-------------------------------------------------------------------------------------------------------|-------------------------|-----|
| Primer: <i>Blm</i> gene 3' breaksite sgRNA transcription,<br>5'-GCACGCTCTGCGCGGCAAGAAGG-3'            | ThermoFisher Scientific | N/A |
| Primer: <i>Blm</i> gene exon22 targeting sgRNA transcription,<br>5'-CGCAGAGAACTGTTAGGAGAAGG-3'        | ThermoFisher Scientific | N/A |
| Primer: <i>Blm</i> gene 5' breaksite sense PCR and sequencing,<br>5'-CATTCCGATTGGGCTTTAGTAGTACG-3'    | ThermoFisher Scientific | N/A |
| Primer: <i>Blm</i> gene 5' breaksite antisense PCR and sequencing,<br>5'-TTTCTGGGTCACCAGGTCTCTACTC-3' | ThermoFisher Scientific | N/A |
| Primer: <i>Blm</i> gene 3' breaksite sense PCR and sequencing,<br>5'-CAAGGAAAATCATGTTTGTCTCCTGG-3'    | ThermoFisher Scientific | N/A |
| Primer: <i>Blm</i> gene 3' breaksite antisense PCR and sequencing,<br>5'-TGTTTCCTCTGTCATTTGTCAAGGC-3' | ThermoFisher Scientific | N/A |
| Primer: <i>Blm</i> exon22 sense PCR and sequencing,<br>5'-ATGTCTTCATGCCAGGCAGTG-3'                    | ThermoFisher Scientific | N/A |
| Primer: <i>AiD</i> antisense PCR and sequencing,<br>5'-GGAGGTTTGGCTGGATCTTTA-3'                       | ThermoFisher Scientific | N/A |
| Primer: Neomycin sense PCR and sequencing,<br>5'-CTATCGCCTTCTTGACGAGT-3'                              | ThermoFisher Scientific | N/A |
| Primer: <i>Blm</i> gene exon22 antisense PCR and sequencing,<br>5'-GCATTACACAAAGGGCAAAGTAGG-3'        | ThermoFisher Scientific | N/A |
| Primer: SMASh antisense PCR and sequencing,<br>5'-AGGAACCCTTATCGTCATCGTCC-3'                          | ThermoFisher Scientific | N/A |
| SMASh antisense2 PCR and sequencing,<br>5'-GGTTCTCCACAGGGATGAAGTCC-3'                                 | ThermoFisher Scientific | N/A |
| <i>Blm</i> 3' locus sense PCR and sequencing,<br>5'-TGCTTCTCAGGCAACATCATCAGC-3'                       | ThermoFisher Scientific | N/A |
| <i>Neomycin</i> antisense PCR and sequencing,<br>5'-GCCAGTCATAGCCGAATAG-3'                            | ThermoFisher Scientific | N/A |
| <i>AiD</i> antisense PCR and sequencing,<br>5'-CTCCGTCCATTGATACCTTCAC-3'                              | ThermoFisher Scientific | N/A |
| ChIP Primer: +109 bp sense<br>5'-TCCGGATAGGGATAACAGGGTA-3'                                            | ThermoFisher Scientific | N/A |
| ChIP Primer: +109 bp antisense<br>5'-GTCGGCCATGATATAGACGTTG-3'                                        | ThermoFisher Scientific | N/A |
| ChIP Primer: +309 bp sense<br>5'-AGCTCGCCGACCACTAC-3'                                                 | ThermoFisher Scientific | N/A |
| ChIP Primer: +309 bp antisense<br>5'-TCCAGCAGGACCATGTGAT-3'                                           | ThermoFisher Scientific | N/A |
| ChIP Primer: +921 bp sense<br>5'-GGACAAGACTTCCACAGATT-3'                                              | ThermoFisher Scientific | N/A |
| ChIP Primer: +921 bp antisense<br>5'-GAGGCGGATCACAAGCAATAAT-3'                                        | ThermoFisher Scientific | N/A |
| ChIP Primer: +1.6 kb sense<br>5'-TCCACATTTGGGCCTATTCTC-3'                                             | ThermoFisher Scientific | N/A |
| ChIP Primer: +1.6 kb antisense<br>5'-CAATAATGAAATATACCTTTTAATGTCT-3'                                  | ThermoFisher Scientific | N/A |
| ChIP Primer: 128 bp sense<br>5'-GAGCGCACCATCTTCTTCA-3'                                                | ThermoFisher Scientific | N/A |
| ChIP Primer: 128 bp antisense<br>5'-TCCCTACGATGCCCTTCA-3'                                             | ThermoFisher Scientific | N/A |
| ChIP Primer: 350 bp sense<br>5'-CTGGACGGCGACGTAAC-3'                                                  | ThermoFisher Scientific | N/A |
| ChIP Primer: 350 bp antisense<br>5'-CGGTGGTGCAGATGAACTT-3'                                            | ThermoFisher Scientific | N/A |

|                                                                                 |                         |     |
|---------------------------------------------------------------------------------|-------------------------|-----|
| ChIP Primer: 900 bp-sense<br>5'-TCTGGAGCATGCGCTTTAG-3'                          | ThermoFisher Scientific | N/A |
| ChIP Primer: 900 bp antisense<br>5'-CTAAAGCGCATGCTCCAGA-3'                      | ThermoFisher Scientific | N/A |
| ChIP Primer: 1.4kb sense<br>5'-CCACTGCCCTTGTGACTAAA-3'                          | ThermoFisher Scientific | N/A |
| ChIP Primer: 1.4kb antisense<br>5'-AGGCTACACCAACGTCAATC-3'                      | ThermoFisher Scientific | N/A |
| RT qPCR Primer: <i>Gapdh</i> sense<br>5'-CGTCCCGTAGACAAAATGGT-3'                | ThermoFisher Scientific | N/A |
| RT qPCR Primer: <i>Gapdh</i> antisense<br>5'-TCGTTGATGGCAACAATCTC-3'            | ThermoFisher Scientific | N/A |
| RT qPCR Primer: <i>Fancm</i> sense<br>5'-GTCGTTATCCTCGCTGAAGG-3'                | ThermoFisher Scientific | N/A |
| RT qPCR Primer: <i>Fancm</i> antisense<br>5'-TTTGTGGACTGACTCTGATTATATGT-3'      | ThermoFisher Scientific | N/A |
| RT qPCR Primer: <i>Fancm</i> MM1 sense<br>5'-CTGTTAAACAAAGGGATTCTAAAT-3'        | ThermoFisher Scientific | N/A |
| RT qPCR Primer: <i>Fancm</i> MM1 antisense<br>5'-GATACAGATTTCTCATCACTG A-3'     | ThermoFisher Scientific | N/A |
| RT qPCR Primer: <i>Fancm</i> MM2 sense<br>5'-TCGTTGTAGTTCCGGGTTCAAG-3'          | ThermoFisher Scientific | N/A |
| RT qPCR Primer: <i>Fancm</i> MM2 antisense<br>5'-AGTGTTCAACTTCAGTGCGCC-3'       | ThermoFisher Scientific | N/A |
| RT qPCR Primer: <i>Fancm</i> DEAH sense<br>5'-TGGCTGAAATGACAGGTTCAACT-3'        | ThermoFisher Scientific | N/A |
| RT qPCR Primer: <i>Fancm</i> DEAH antisense<br>5'-GCCTTATGAGCTTCATCCACC-3'      | ThermoFisher Scientific | N/A |
| RT qPCR Primer: <i>Brca1</i> sense<br>5'-ATGAGCTGGAGAGGATGCTG-3'                | ThermoFisher Scientific | N/A |
| RT qPCR Primer: <i>Brca1</i> antisense<br>5'-CTGGGCAGTTGCTGTCTTCT-3'            | ThermoFisher Scientific | N/A |
| RT qPCR Primer: <i>Fanca</i> sense<br>5'-GGCAGCCCTGTACAACGAT-3'                 | ThermoFisher Scientific | N/A |
| RT qPCR Primer: <i>Fanca</i> antisense<br>5'-GCCAGCAGCTCTGTCATGTT-3'            | ThermoFisher Scientific | N/A |
| RT qPCR Primer: <i>Fancf</i> sense<br>5'-TATGATCTGCAAAAGGGTGCCTGG-3'            | ThermoFisher Scientific | N/A |
| RT qPCR Primer: <i>Fancf</i> antisense<br>5'-CTCTTCCTGCAGAAATGGCTGGGC-3'        | ThermoFisher Scientific | N/A |
| RT qPCR Primer: <i>Blm</i> sense<br>5'-CGCGACGTAAGCCTGAGT-3'                    | ThermoFisher Scientific | N/A |
| RT qPCR Primer: <i>Blm</i> antisense<br>5'-TGGCTGAGTGTCGCTGTAGT-3'              | ThermoFisher Scientific | N/A |
| Genotyping Primer: <i>Brca1</i> intron10 sense<br>5'-CTGGGTAGTTTGTAAGCATCC-3'   | ThermoFisher Scientific | N/A |
| Genotyping Primer: <i>Brca1</i> exon11 antisense<br>5'-CAATAAAGTCTGGTCTCAGGC-3' | ThermoFisher Scientific | N/A |
| Genotyping Primer: <i>Brca1</i> exon12 antisense<br>5'-CTGCGAGCAGTCTTCAGAAAG-3' | ThermoFisher Scientific | N/A |
